# Supplementary material
Source: Copernicus journal article supplement (doi:10.5194/acp-26-7933-2026)
Supplement: Supplementary file 1 [file acp-26-7933-2026-supplement.pdf]

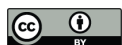

*Supplement of*

## **Satellite observations reveal heterogeneous atmospheric composition responses to rapid emission changes**

**Zeyu Yang et al.**

*Correspondence to:* Jing Wei ([jingwei@pku.edu.cn](mailto:jingwei@pku.edu.cn))

The copyright of individual parts of the supplement might differ from the article licence.

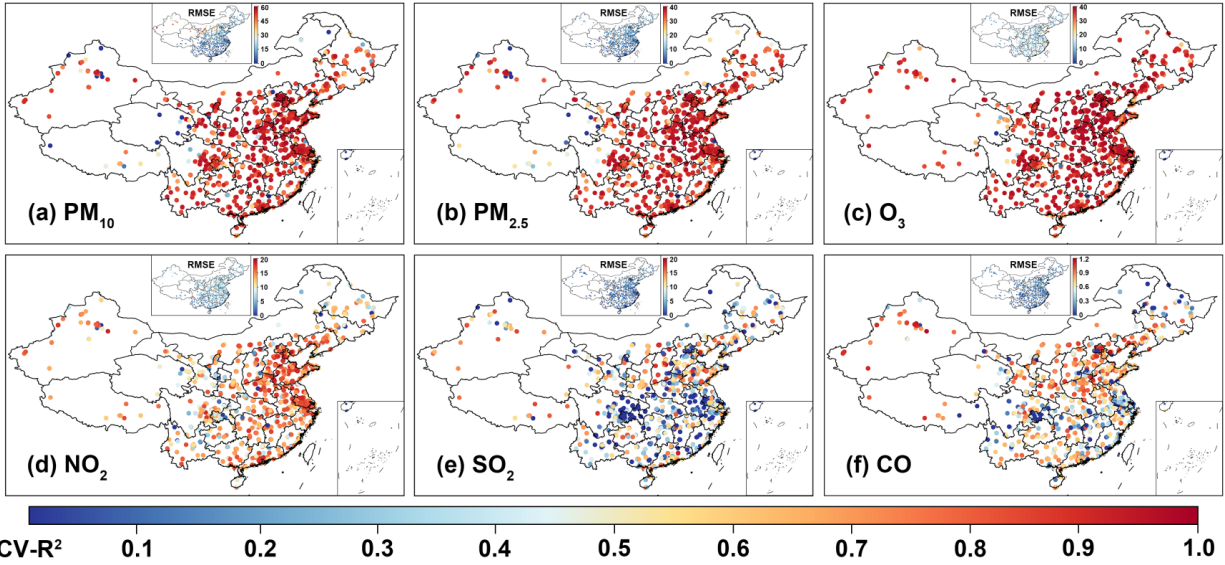

**Figure S1. Site-specific overall accuracy of daily air pollutant estimates.**

Spatial distributions of sample-based cross-validated (CV) coefficients of determination ( $R^2$ ) and root-mean-square errors (RMSE) for daily estimates of (a) PM<sub>10</sub> ( $\mu\text{g m}^{-3}$ ), (b) PM<sub>2.5</sub> ( $\mu\text{g m}^{-3}$ ), (c) O<sub>3</sub> ( $\mu\text{g m}^{-3}$ ), (d) NO<sub>2</sub> ( $\mu\text{g m}^{-3}$ ), (e) SO<sub>2</sub> ( $\mu\text{g m}^{-3}$ ), and (f) CO ( $\text{mg m}^{-3}$ ) compared with ground-based measurements at each Ministry of Ecology and Environment (MEE) monitoring station across China from 2019 to 2022.

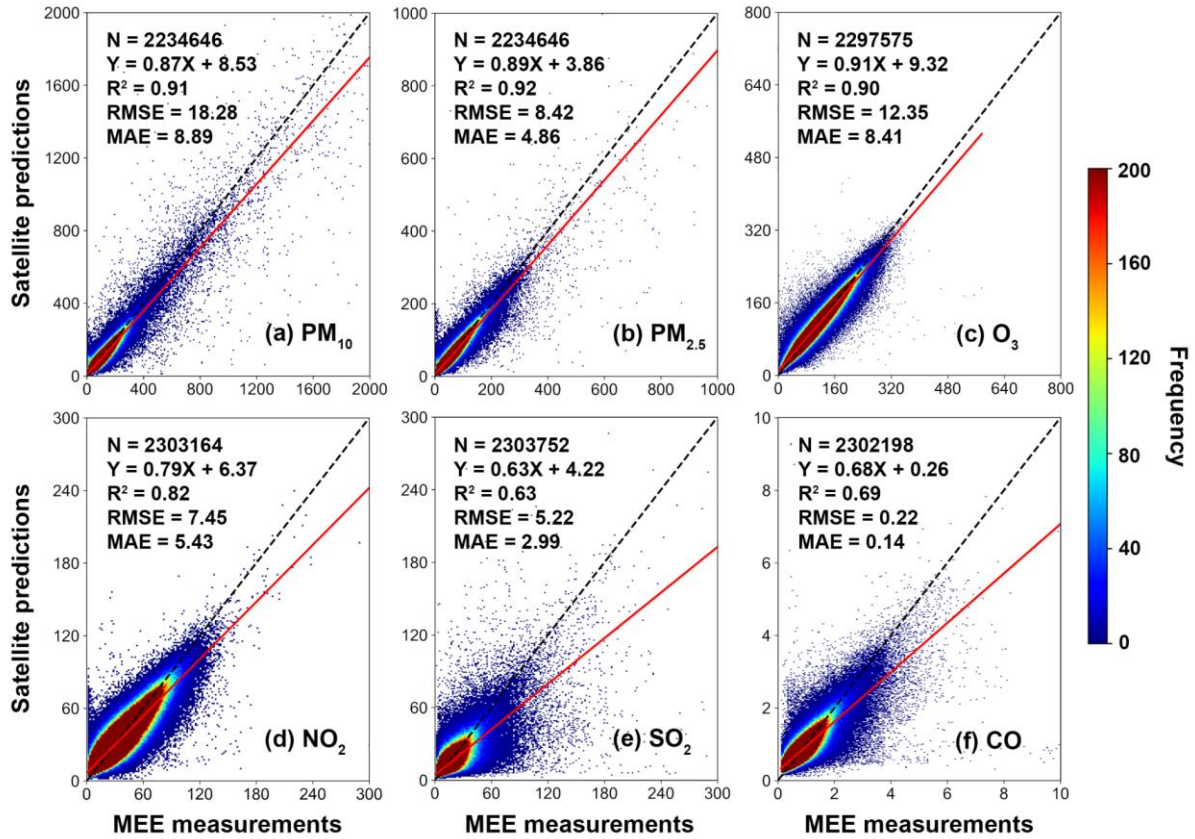

**Figure S2. Spatial prediction accuracy of daily air pollutants in China.**

Density scatter plots of satellite-derived daily gapless 1 km concentrations of ambient air pollutants—(a) PM<sub>10</sub> ( $\mu\text{g m}^{-3}$ ), (b) PM<sub>2.5</sub> ( $\mu\text{g m}^{-3}$ ), (c) O<sub>3</sub> ( $\mu\text{g m}^{-3}$ ), (d) NO<sub>2</sub> ( $\mu\text{g m}^{-3}$ ), (e) SO<sub>2</sub> ( $\mu\text{g m}^{-3}$ ), and (f) CO ( $\text{mg m}^{-3}$ )—using the unified four-dimensional spatiotemporal deep forest (4D-STDF) model against ground-based measurements from all Ministry of Ecology and Environment (MEE) monitoring stations across China from 2019 to 2022, based on station-based 10-fold cross-validation approach. The black dashed lines represent the 1:1 reference lines, while the red lines indicate the best-fit lines derived from linear regression.

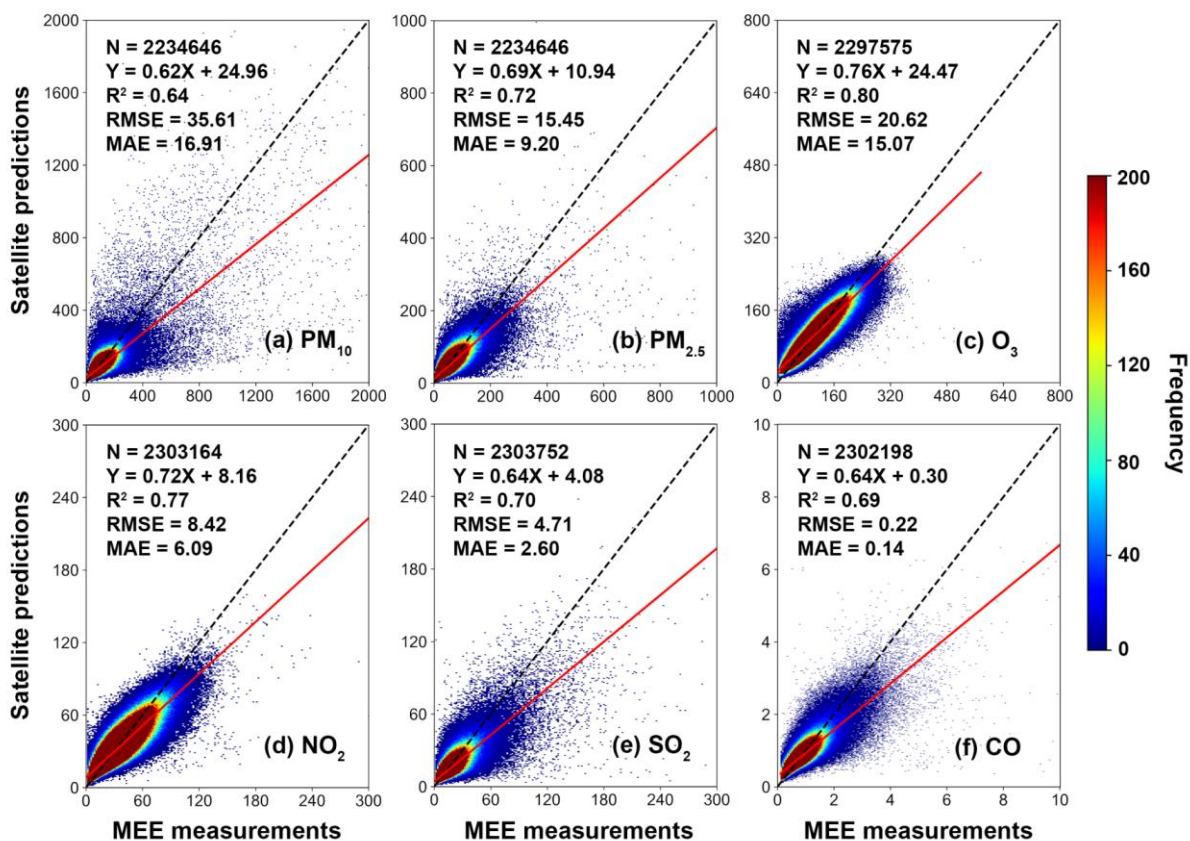

**Figure S3. Temporal prediction accuracy of daily air pollutants in China.**

Density scatter plots of satellite-derived daily gapless 1 km concentrations of ambient air pollutants—(a)  $PM_{10}$  ( $\mu\text{g m}^{-3}$ ), (b)  $PM_{2.5}$  ( $\mu\text{g m}^{-3}$ ), (c)  $O_3$  ( $\mu\text{g m}^{-3}$ ), (d)  $NO_2$  ( $\mu\text{g m}^{-3}$ ), (e)  $SO_2$  ( $\mu\text{g m}^{-3}$ ), and (f) CO ( $\text{mg m}^{-3}$ )—using the unified four-dimensional spatiotemporal deep forest (4D-STDF) model against ground-based measurements from all Ministry of Ecology and Environment (MEE) monitoring stations across China from 2019 to 2022, based on day-based 10-fold cross-validation approach. The black dashed lines represent the 1:1 reference lines, while the red lines indicate the best-fit lines derived from linear regression.

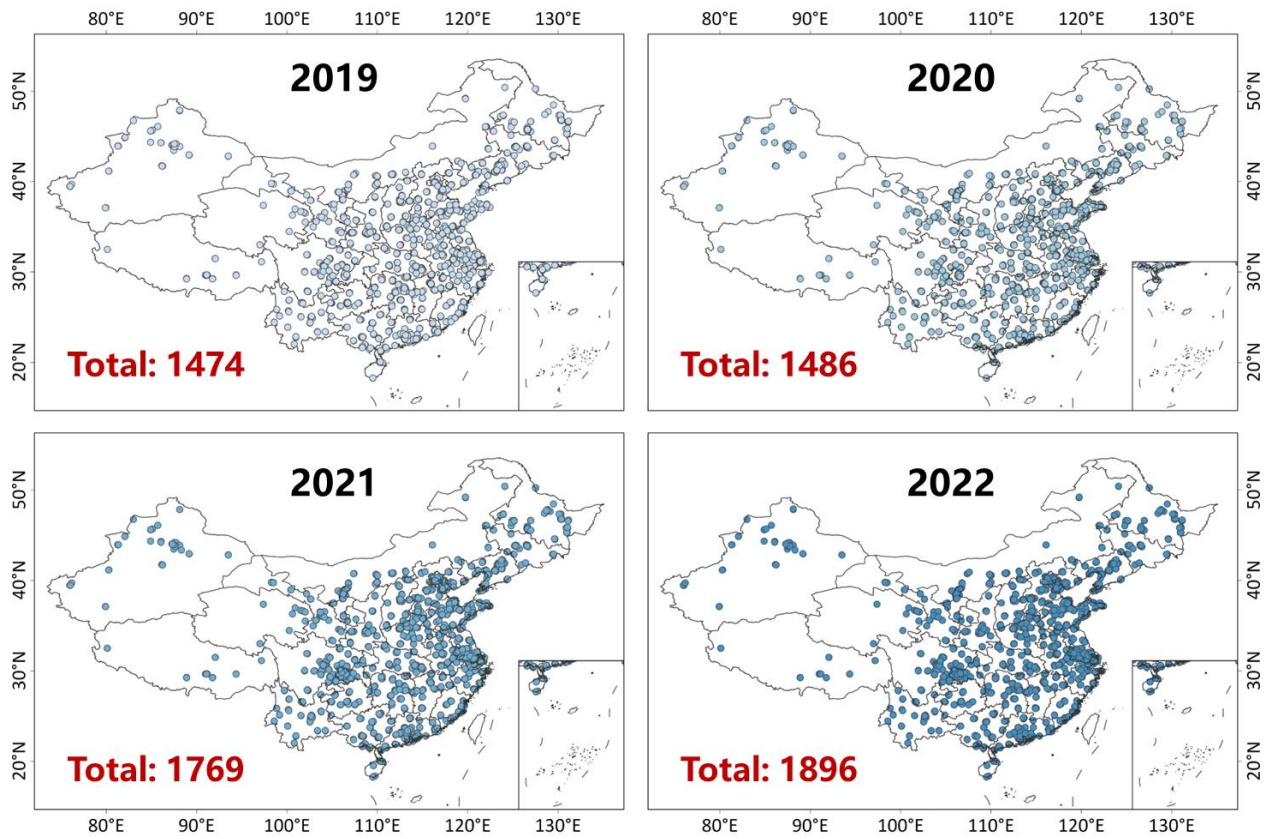

**Figure S4. Spatial distribution of monitoring stations in China.**

Spatial distribution of ground-based monitoring stations across China from 2019 to 2022. Numbers shown in each panel indicate the total number of stations for the corresponding year.

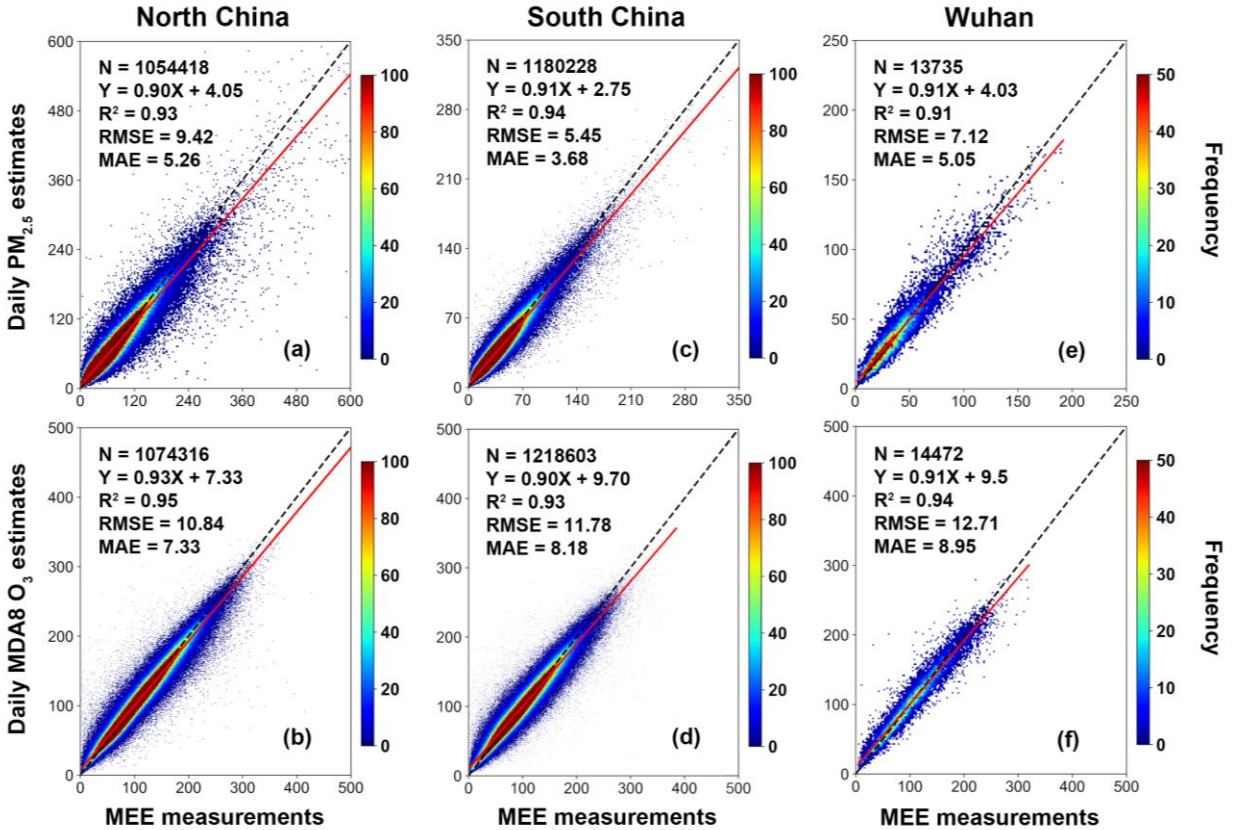

**Figure S5. Regional validation of daily surface O<sub>3</sub> estimates.**

Density scatter plots of satellite-derived daily concentrations of (a–c) PM<sub>2.5</sub> ( $\mu\text{g m}^{-3}$ ) and (d–f) O<sub>3</sub> ( $\mu\text{g m}^{-3}$ ) from the unified four-dimensional spatiotemporal deep forest (4D-STDF) model against ground-based measurements in Northern China (left), Southern China (middle), and Wuhan (right), based on sample-based cross-validation. The black dashed lines represent the 1:1 reference lines, and the red lines indicate the fitted linear regression lines.

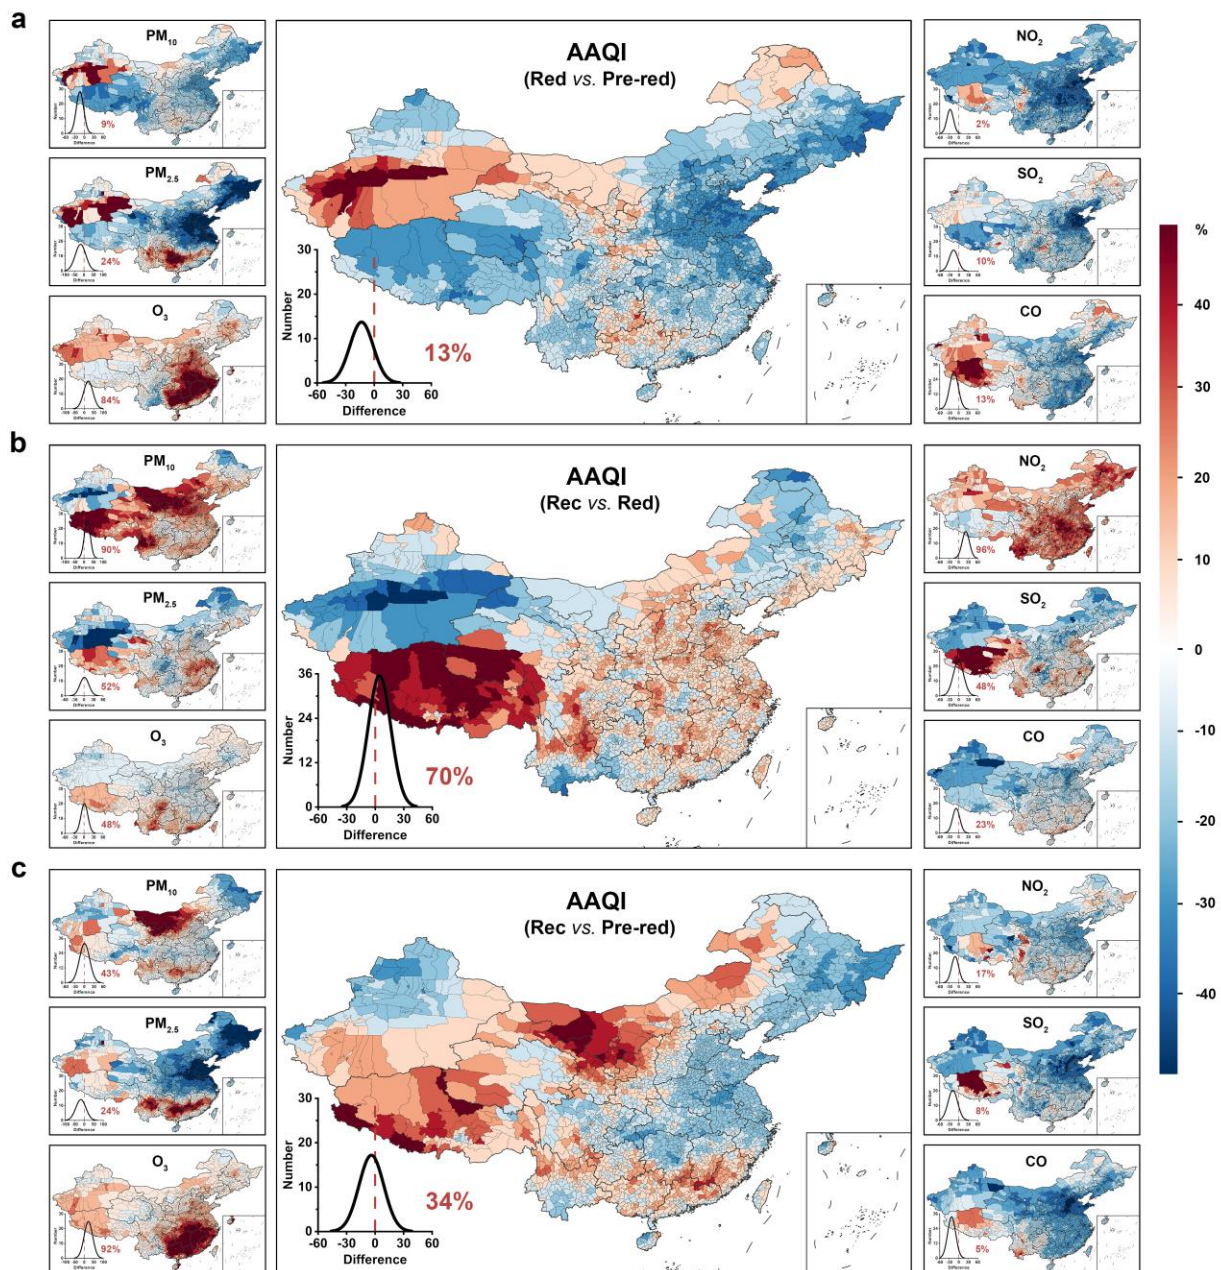

**Figure S6. Changes in air pollution across different emission-change eras.**

Spatial distributions of relative differences (%) in the Aggregated Air Quality Index (AAQI) and Individual Air Quality Index (IAQI) for  $PM_{10}$ ,  $PM_{2.5}$ ,  $O_3$ ,  $NO_2$ ,  $SO_2$ , and  $CO$  during the most stringent emission reduction periods, compared across three eras—(a) reduction vs. pre-reduction, (b) recovery vs. reduction, and (c) recovery vs. pre-reduction—at the country level in China. Lower-left plots display frequency histograms, with red numbers indicating the percentage of counties showing deteriorating air quality.

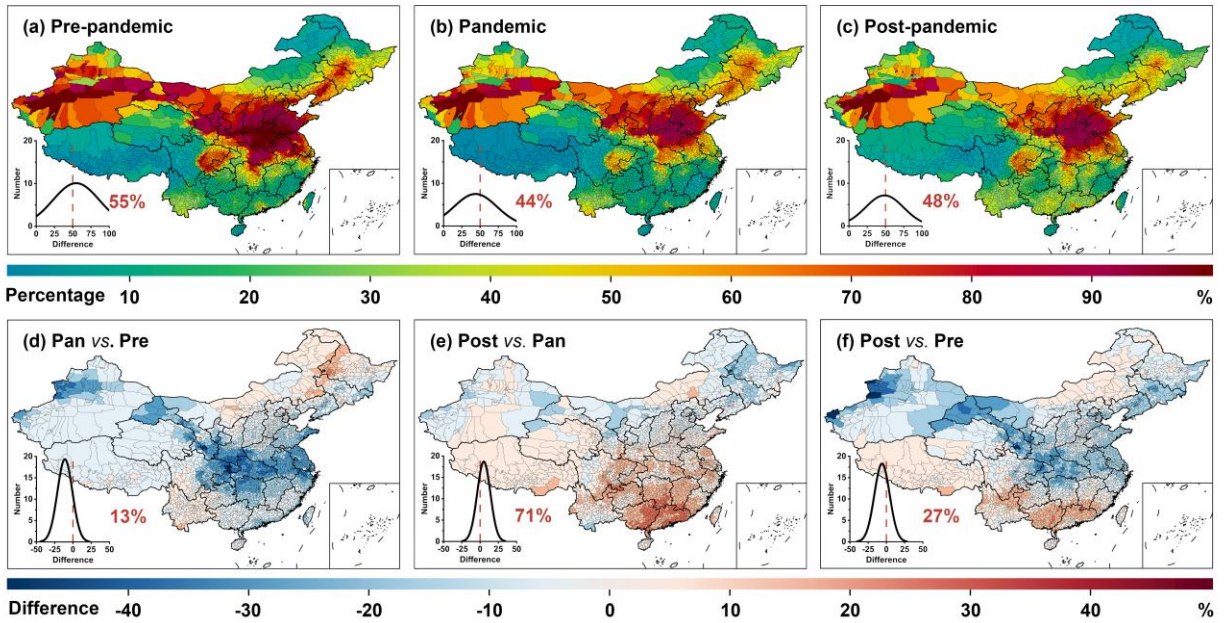

**Figure S7. Changes in unhealthy air days across different emission-change eras.**

Spatial distribution of the percentage of days exceeding unhealthy air quality levels [i.e., falling outside the Good (AAQI = 0–50) and Moderate (51–100) categories] during the first quarter (January–March) for (a) pre-reduction, (b) reduction, and (c) recovery periods, along with percentage differences for (d) reduction vs. pre-reduction, (e) recovery vs. reduction, and (f) recovery vs. pre-reduction at the country level across China.

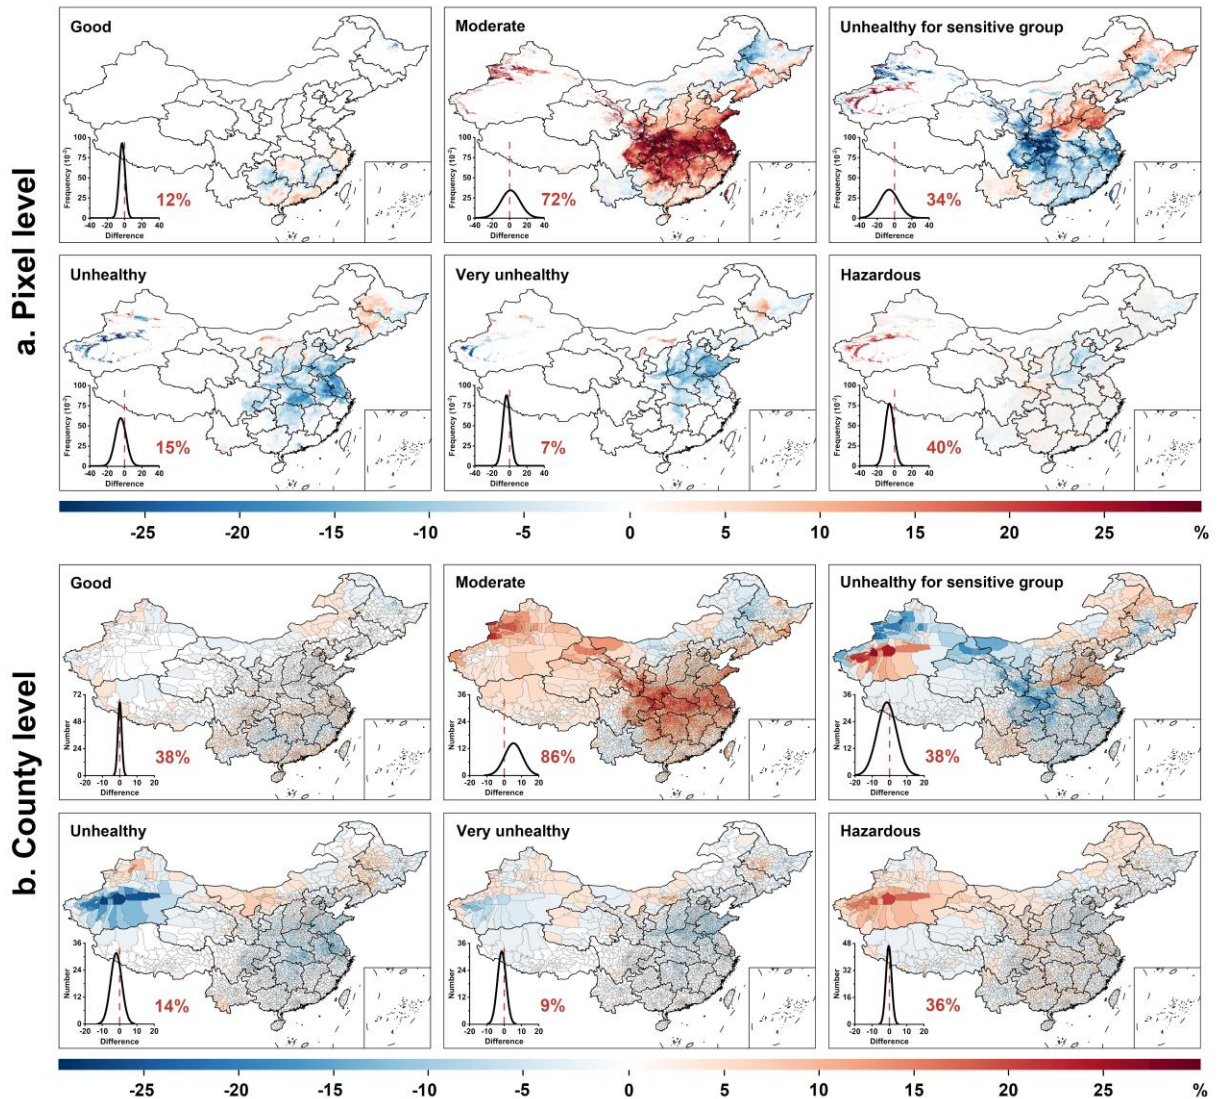

**Figure S8. Changes in polluted days between the reduction and pre-reduction periods.**

Spatial distribution of differences (%) in the number of days exceeding various air quality levels: (a) Good (AQI = 0–50), (b) Moderate (51–100), (c) Unhealthy for Sensitive Groups (101–150), (d) Unhealthy (151–200), (e) Very Unhealthy (201–300), and (f) Hazardous (301–500). Data cover (top) each 1-km<sup>2</sup> grid for inhabited areas (population density > 1 person km<sup>-2</sup>), and (bottom) the country level across China, comparing air quality between the reduction (2020) and pre-reduction (2019) periods during the first quarter (January–March). Lower-left plots display frequency histograms, with red numbers indicating the percentage of pixels or counties showing positive changes.

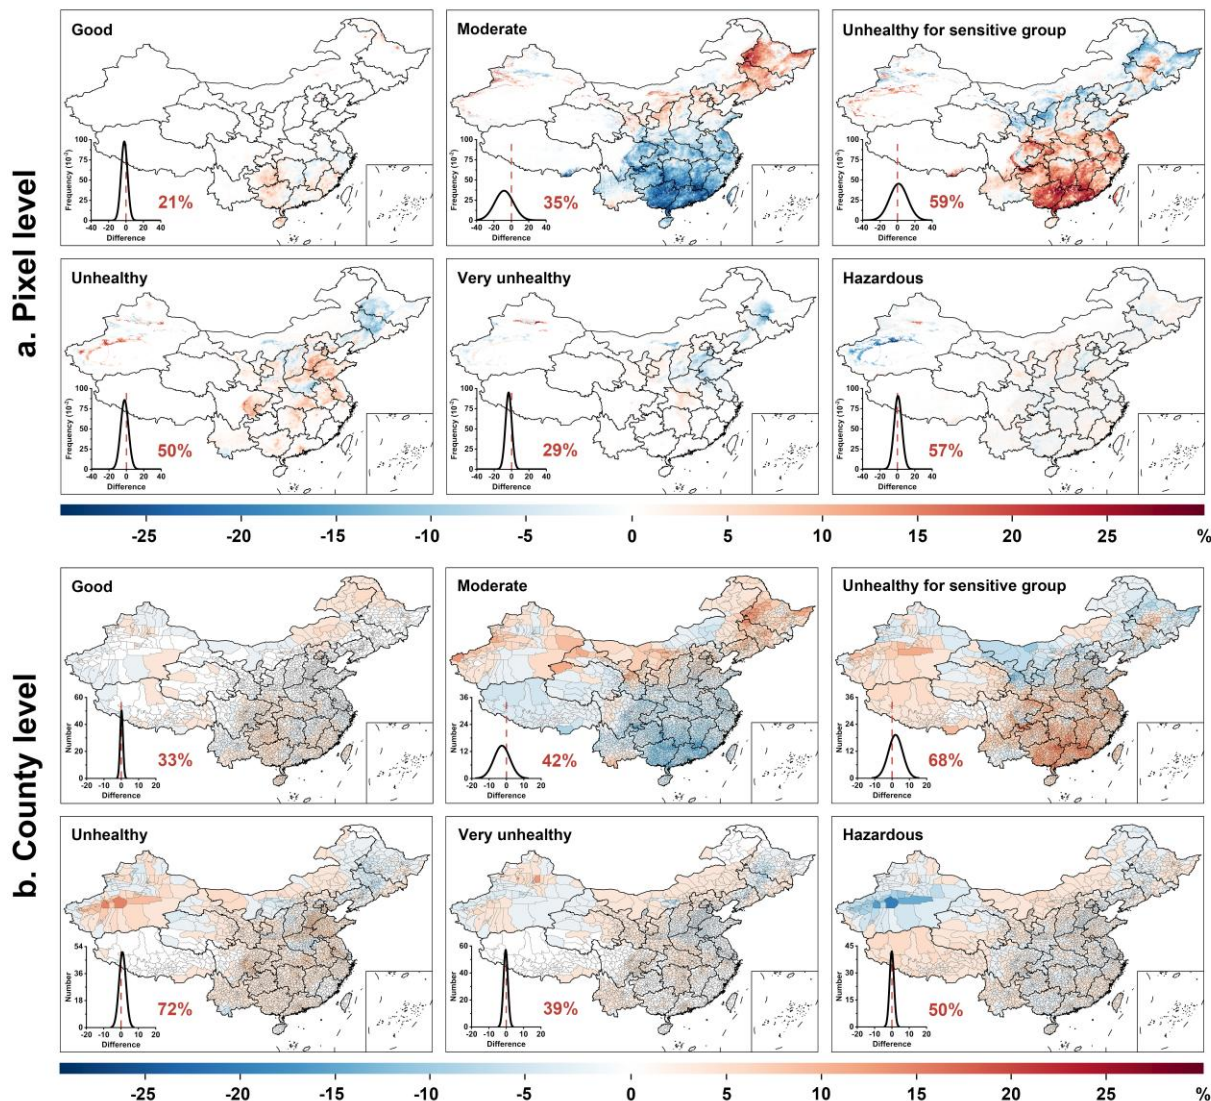

**Figure S9. Changes in polluted days between the recovery and reduction periods.**

Spatial distribution of differences (%) in the number of days exceeding various air quality levels: (a) Good (AQI = 0–50), (b) Moderate (51–100), (c) Unhealthy for Sensitive Groups (101–150), (d) Unhealthy (151–200), (e) Very Unhealthy (201–300), and (f) Hazardous (301–500). Data cover (top) 1-km<sup>2</sup> grid for inhabited areas (population density > 1 person km<sup>-2</sup>), and (bottom) the country level across China, comparing air quality between the recovery (2021–2022) and reduction (2020) periods during the first quarter (January–March). Lower-left plots display frequency histograms, with red numbers indicating the percentage of pixels or counties showing positive changes.

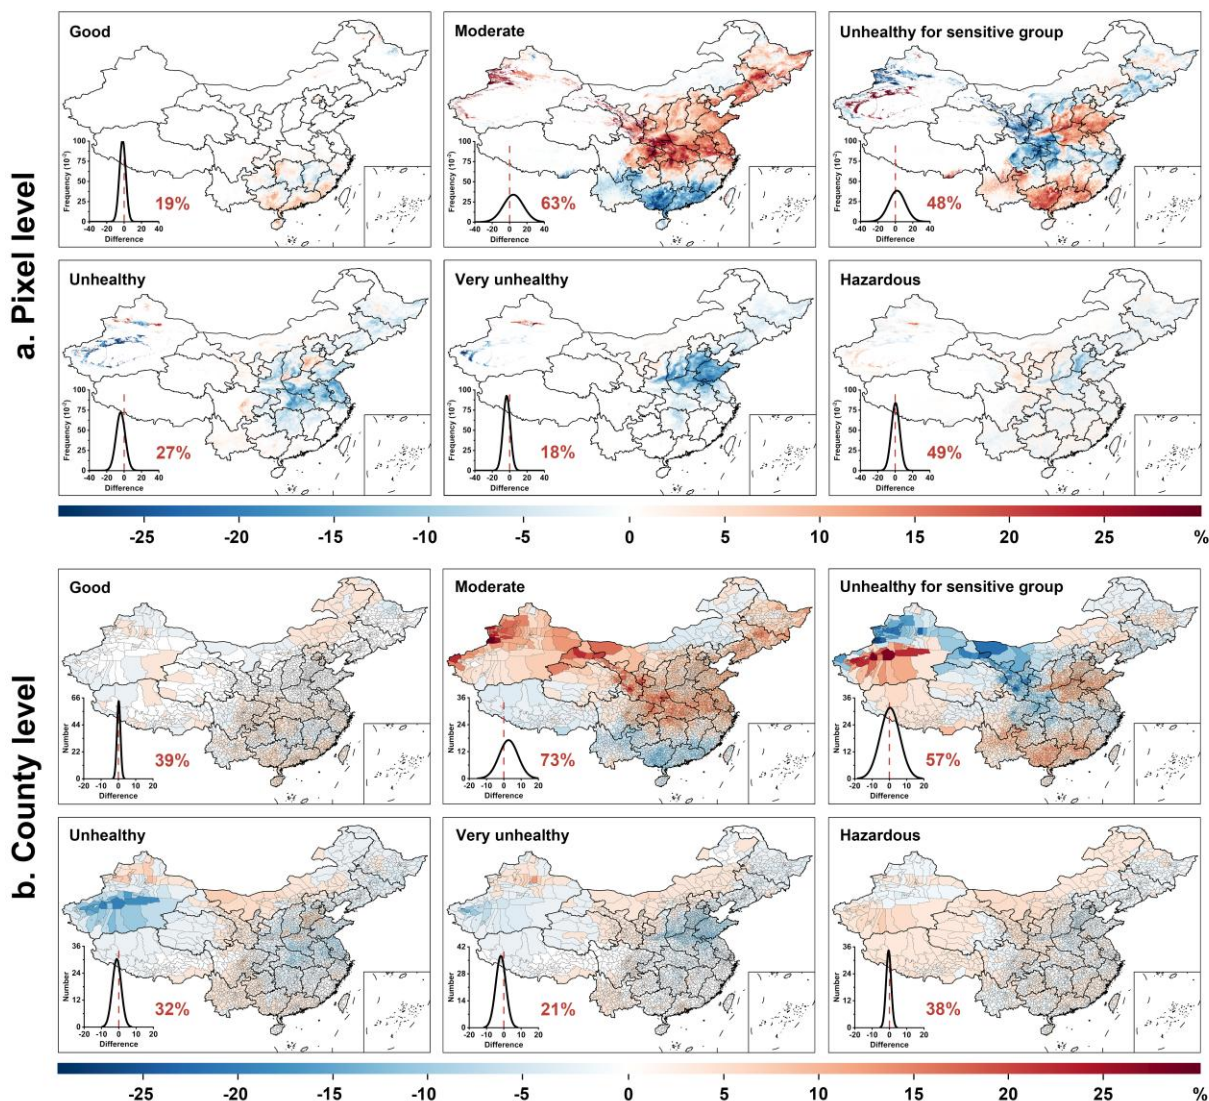

**Figure S10. Changes in polluted days between the recovery and pre-reduction periods.** Spatial distribution of differences (%) in the number of days exceeding various air quality levels: (a) Good (AQI = 0–50), (b) Moderate (51–100), (c) Unhealthy for Sensitive Groups (101–150), (d) Unhealthy (151–200), (e) Very Unhealthy (201–300), and (f) Hazardous (301–500). Data cover (top) each 1-km<sup>2</sup> grid for inhabited areas (population density > 1 person km<sup>-2</sup>), and (bottom) the country level across China, comparing air quality between the recovery (2021–2022) and pre-reduction (2019) periods during the first quarter (January–March). Lower-left plots display frequency histograms, with red numbers indicating the percentage of pixels or counties showing positive changes.

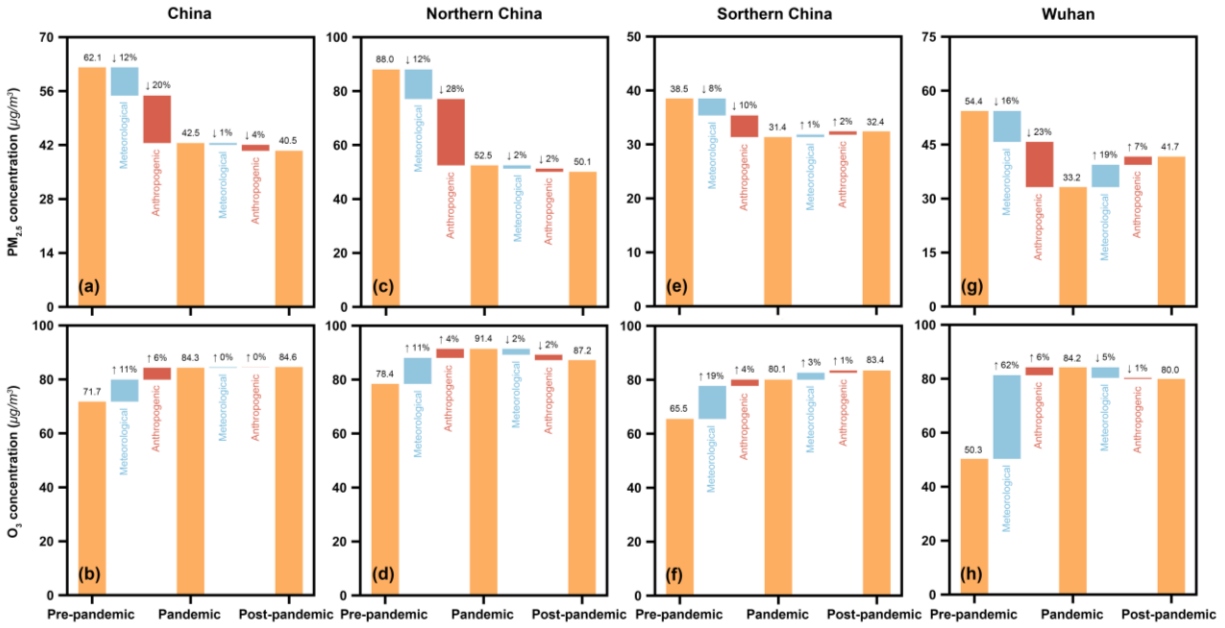

**Figure S11. Drivers of air quality variations across different emission-change eras.**

Influencing factors driving changes in ambient PM<sub>2.5</sub> and O<sub>3</sub> pollution during the most stringent emission reduction period—from the pre-reduction (2019) to the reduction (2020) and recovery (2021–2022) periods—in (a & b) China, (c & d) Northern China, (e & f) Southern China, and (g & h) Wuhan city, Hubei province, respectively, using the traditional Multiple Linear Regression (MLR) method. The blue and red bars represent the impacts of meteorological conditions and anthropogenic emissions, respectively.

**Table S1.** Summary of datasets used in air pollutant modeling with deep learning.

| Content                                 | Abbreviation                                                                                       | Spatial Resolution | Temporal Resolution | Data Source                      |
|-----------------------------------------|----------------------------------------------------------------------------------------------------|--------------------|---------------------|----------------------------------|
| Air quality measurements                | PM <sub>2.5</sub> , PM <sub>10</sub> ,<br>NO <sub>2</sub> , SO <sub>2</sub> , O <sub>3</sub><br>CO | in situ            | Hourly              | CNEMC (MEE, 2018)                |
| MAIAC AOD (550 nm)                      | AOD                                                                                                | 1 km × 1 km        | Daily               | MCD19A2 (Lyapustin et al., 2018) |
| Tropospheric NO <sub>2</sub> column     | NO <sub>2</sub>                                                                                    | 1 km × 1 km        | Daily               | TROPOMI (Veefkind et al., 2012)  |
| Total SO <sub>2</sub> column            | SO <sub>2</sub>                                                                                    |                    |                     |                                  |
| Total CO column                         | CO                                                                                                 |                    |                     |                                  |
| Tropospheric HCHO column                | HCHO                                                                                               |                    |                     |                                  |
| Downward shortwave radiation            | DSR                                                                                                | 1 km × 1 km        | Daily               | MCD18A1 (Wang et al., 2020)      |
| Land surface temperature                | LST                                                                                                | 1 km × 1 km        | Daily               | MODIS (Zhang et al., 2022)       |
| PM <sub>2.5</sub> mass simulation       | PM <sub>2.5</sub>                                                                                  | 0.25° × 0.25°      | Hourly              | GEOS-CF (Keller et al., 2021)    |
| Surface NO <sub>2</sub> mass simulation | NO <sub>2</sub>                                                                                    |                    |                     |                                  |
| Surface SO <sub>2</sub> mass simulation | SO <sub>2</sub>                                                                                    |                    |                     |                                  |
| Surface CO mass simulation              | CO                                                                                                 |                    |                     |                                  |
| Surface O <sub>3</sub> mass simulation  | O <sub>3</sub>                                                                                     |                    |                     |                                  |
| PM <sub>10</sub> mass simulation        | MPM <sub>10</sub>                                                                                  | 0.75° × 0.75°      | 3-hour              | CAMS (Inness et al., 2019)       |
| Ammonia                                 | NH <sub>3</sub>                                                                                    | 1 km × 1 km        | Daily               | ABaCAS-EI (Li et al., 2023)      |
| Nitrogen oxides                         | NO <sub>x</sub>                                                                                    |                    |                     |                                  |
| Sulfur dioxide                          | SO <sub>2</sub>                                                                                    |                    |                     |                                  |
| Carbon monoxide                         | CO                                                                                                 |                    |                     |                                  |
| Volatile organic compounds              | VOCs                                                                                               |                    |                     |                                  |
| Fine particle                           | PM <sub>2.5</sub>                                                                                  |                    |                     |                                  |
| Coarse particle                         | PM <sub>10</sub>                                                                                   |                    |                     |                                  |
| Temperature                             | TEM                                                                                                | 0.1° × 0.1°        | Hourly              | ERA5 (Hersbach et al., 2020)     |
| U-component of wind                     | WU                                                                                                 | 0.25° × 0.25°      |                     |                                  |
| V-component of wind                     | WV                                                                                                 |                    |                     |                                  |
| Surface pressure                        | SP                                                                                                 |                    |                     |                                  |
| Precipitation                           | TP                                                                                                 |                    |                     |                                  |
| Evaporation                             | ET                                                                                                 |                    |                     |                                  |
| Boundary-layer height                   | BLH                                                                                                |                    |                     |                                  |
| Relative humidity                       | RH                                                                                                 |                    |                     |                                  |
| Population density                      | POD                                                                                                |                    | 1 km × 1 km         | Annual                           |
| Nighttime lights                        | NTL                                                                                                | 500 m × 500 m      | Monthly             | VIIRS (Elvidge et al., 2017)     |
| NDVI                                    | NDVI                                                                                               | 1 km × 1 km        | Monthly             | MOD13A3 (Didan et al., 2015)     |
| Surface elevation                       | DEM                                                                                                | 90 m × 90 m        | -                   | SRTM (Farr et al., 2007)         |

**Table S2.** Air Quality Index (AQI) and its descriptions (MEE, 2012).

| Levels                         | Index Value      | Description of Air Quality                                                                                              |
|--------------------------------|------------------|-------------------------------------------------------------------------------------------------------------------------|
| Good                           | [0, 50]          | Air quality is satisfactory, and air pollution poses little or no risk.                                                 |
| Moderate                       | (50, 100]        | Air quality is acceptable. However, there may be a risk for some people, particularly those sensitive to pollution.     |
| Unhealthy for Sensitive Groups | (100, 150]       | Members of sensitive groups may experience health effects. The general public is less likely to be affected.            |
| Unhealthy                      | (150, 200]       | Some members of the general public may experience health effects; sensitive groups may experience more serious effects. |
| Very Unhealthy                 | (200, 300]       | Health alert: The risk of health effects is increased for everyone.                                                     |
| Hazardous                      | (300, $\infty$ ) | Health warning of emergency conditions: everyone is more likely to be affected.                                         |

**Table S3.** Input variables and Variance Inflation Factor (VIF) values in PM<sub>2.5</sub> driving analysis.

| <b>Category</b>            | <b>Variable</b>            | <b>China</b> | <b>Northern<br/>China</b> | <b>Southern<br/>China</b> | <b>Wuhan</b> |
|----------------------------|----------------------------|--------------|---------------------------|---------------------------|--------------|
| Anthropogenic<br>emissions | Carbon monoxide            | 2.30         | 2.48                      | 2.02                      | 2.47         |
|                            | Nitrogen dioxide           | 4.52         | 4.16                      | 3.78                      | 2.91         |
|                            | Sulfur dioxide             | 5.42         | 5.28                      | 3.20                      | 4.26         |
|                            | Volatile Organic Compounds | 2.70         | 2.12                      | 1.99                      | 1.25         |
| Meteorological<br>factors  | Air temperature            | 3.52         | 5.27                      | 3.94                      | 2.53         |
|                            | Boundary layer height      | 2.76         | 2.62                      | 2.66                      | 2.82         |
|                            | Relative humidity          | 4.33         | 4.08                      | 2.64                      | 1.93         |
|                            | Surface pressure           | 1.82         | 7.19                      | 4.07                      | 2.52         |
|                            | Total precipitation        | 1.53         | 1.41                      | 1.67                      | 1.40         |
|                            | Wind direction             | 1.66         | 1.67                      | 1.72                      | 1.42         |
|                            | Wind Speed                 | 1.97         | 1.94                      | 2.00                      | 2.25         |

**Table S4.** Input variables and Variance Inflation Factor (VIF) values in O<sub>3</sub> driving analysis.

| <b>Category</b>            | <b>Variable</b>              | <b>China</b> | <b>Northern<br/>China</b> | <b>Southern<br/>China</b> | <b>Wuhan</b> |
|----------------------------|------------------------------|--------------|---------------------------|---------------------------|--------------|
| Anthropogenic<br>emissions | Carbon monoxide              | 2.30         | 2.03                      | 2.06                      | 1.96         |
|                            | Nitrogen dioxide             | 2.90         | 3.01                      | 2.07                      | 1.70         |
|                            | Volatile Organic Compounds   | 2.92         | 2.25                      | 2.06                      | 1.28         |
| Meteorological<br>factors  | Air temperature              | 9.86         | 1.58                      | 4.49                      | 2.90         |
|                            | Boundary layer height        | 2.68         | 4.07                      | 3.17                      | 2.99         |
|                            | Downward shortwave radiation | 1.85         | 1.43                      | 1.30                      | 1.50         |
|                            | Relative humidity            | 2.77         | 3.45                      | 3.24                      | 2.29         |
|                            | Surface pressure             | 8.79         | 1.70                      | 4.84                      | 2.81         |
|                            | Surface sensible heat flux   | 2.06         | 2.15                      | 2.14                      | 1.91         |
|                            | Total cloud cover            | 1.65         | 2.23                      | 1.71                      | 1.72         |
|                            | Total precipitation          | 1.62         | 1.70                      | 1.73                      | 1.58         |
|                            | Wind direction               | 1.68         | 1.62                      | 1.83                      | 1.47         |
|                            | Wind Speed                   | 1.87         | 2.81                      | 2.08                      | 2.23         |

**Table S5.** Year-specific prediction accuracy of daily air pollutants estimates in China.

| <b>Variable</b>   | <b>Year</b> | <b>Slope</b> | <b>R<sup>2</sup></b> | <b>RMSE</b> | <b>MAE</b> |
|-------------------|-------------|--------------|----------------------|-------------|------------|
| PM <sub>10</sub>  | 2019        | 0.86         | 0.91                 | 17.11       | 9.26       |
|                   | 2020        | 0.86         | 0.89                 | 16.64       | 7.93       |
|                   | 2021        | 0.89         | 0.93                 | 20.21       | 8.06       |
|                   | 2022        | 0.90         | 0.93                 | 12.51       | 6.97       |
| PM <sub>2.5</sub> | 2019        | 0.90         | 0.93                 | 8.79        | 5.15       |
|                   | 2020        | 0.90         | 0.93                 | 7.97        | 4.46       |
|                   | 2021        | 0.90         | 0.93                 | 7.25        | 4.22       |
|                   | 2022        | 0.91         | 0.94                 | 6.40        | 4.00       |
| O <sub>3</sub>    | 2019        | 0.90         | 0.93                 | 13.59       | 9.32       |
|                   | 2020        | 0.91         | 0.94                 | 11.08       | 7.68       |
|                   | 2021        | 0.91         | 0.94                 | 10.64       | 7.43       |
|                   | 2022        | 0.93         | 0.95                 | 10.11       | 6.92       |
| NO <sub>2</sub>   | 2019        | 0.82         | 0.86                 | 7.19        | 5.17       |
|                   | 2020        | 0.83         | 0.87                 | 6.35        | 4.54       |
|                   | 2021        | 0.83         | 0.87                 | 6.10        | 4.42       |
|                   | 2022        | 0.81         | 0.86                 | 5.8         | 4.12       |
| SO <sub>2</sub>   | 2019        | 0.77         | 0.81                 | 4.87        | 2.54       |
|                   | 2020        | 0.74         | 0.79                 | 4.08        | 2.14       |
|                   | 2021        | 0.71         | 0.77                 | 3.64        | 1.91       |
|                   | 2022        | 0.71         | 0.76                 | 3.13        | 1.74       |
| CO                | 2019        | 0.78         | 0.82                 | 0.20        | 0.13       |
|                   | 2020        | 0.77         | 0.81                 | 0.18        | 0.11       |
|                   | 2021        | 0.72         | 0.75                 | 0.18        | 0.11       |
|                   | 2022        | 0.74         | 0.78                 | 0.16        | 0.10       |

## References

- Didan, K., Munoz, A. B., Solano, R., and Huete, A.: MODIS vegetation index user's guide (MOD13 series), University of Arizona: vegetation index and Phenology Lab, 35, 2–33, 2015.
- Dobson, J. E., Bright, E. A., Coleman, P. R., Durfee, R. C., and Worley, B. A.: LandScan: a global population database for estimating populations at risk, *Photogrammetric engineering and remote sensing*, 66, 849–857, 2000.
- Elvidge, C. D., Baugh, K., Zhizhin, M., Hsu, F. C., and Ghosh, T.: VIIRS night-time lights, *International Journal of Remote Sensing*, 38, 5860–5879, 2017.
- Farr, T. G., Rosen, P. A., Caro, E., Crippen, R., Duren, R., Hensley, S., Kobrick, M., Paller, M., Rodriguez, E., Roth, L., Seal, D., Shaffer, S., Shimada, J., Umland, J., Werner, M., Oskin, M., Burbank, D., and Alsdorf, D.: The Shuttle Radar Topography Mission, *Reviews of Geophysics*, 45, 2007.
- Hersbach, H., Bell, B., Berrisford, P., Hirahara, S., Horányi, A., Muñoz-Sabater, J., Nicolas, J., Peubey, C., Radu, R., Schepers, D., Simmons, A., Soci, C., Abdalla, S., Abellan, X., Balsamo, G., Bechtold, P., Biavati, G., Bidlot, J., Bonavita, M., De Chiara, G., Dahlgren, P., Dee, D., Diamantakis, M., Dragani, R., Flemming, J., Forbes, R., Fuentes, M., Geer, A., Haimberger, L., Healy, S., Hogan, R. J., Hólm, E., Janisková, M., Keeley, S., Laloyaux, P., Lopez, P., Lupu, C., Radnoti, G., de Rosnay, P., Rozum, I., Vamborg, F., Villaume, S., and Thépaut, J.-N.: The ERA5 global reanalysis, *Quarterly Journal of the Royal Meteorological Society*, 146, 1999–2049, 2020.
- Inness, A., Ades, M., Agustí-Panareda, A., Barré, J., Benedictow, A., Blechschmidt, A. M., Dominguez, J. J., Engelen, R., Eskes, H., Flemming, J., Huijnen, V., Jones, L., Kipling, Z., Massart, S., Parrington, M., Peuch, V. H., Razinger, M., Remy, S., Schulz, M., and Suttie, M.: The CAMS reanalysis of atmospheric composition, *Atmospheric Chemistry and Physics*, 19, 3515–3556, 2019.
- Keller, C. A., Knowland, K. E., Duncan, B. N., Liu, J., Anderson, D. C., Das, S., Lucchesi, R. A., Lundgren, E. W., Nicely, J. M., Nielsen, E., Ott, L. E., Saunders, E., Strode, S. A., Wales, P. A., Jacob, D. J., and Pawson, S.: Description of the NASA GEOS Composition Forecast Modeling System GEOS-CF v1.0, *Journal of Advances in Modeling Earth Systems*, 13, e2020MS002413, 2021.
- Li, S., Wang, S., Wu, Q., Zhang, Y., Ouyang, D., Zheng, H., Han, L., Qiu, X., Wen, Y., Liu, M., Jiang, Y., Yin, D., Liu, K., Zhao, B., Zhang, S., Wu, Y., and Hao, J.: Emission trends of air pollutants and CO<sub>2</sub> in China from 2005 to 2021, *Earth System Science Data*, 15, 2279–2294, 2023.
- Lyapustin, A., Wang, Y., Korkin, S., and Huang, D.: MODIS Collection 6 MAIAC algorithm, *Atmospheric Measurement Techniques*, 11, 5741–5765, 2018.
- MEE: Technical Regulation on Ambient Air Quality Index (on trial), 2012.
- MEE: Ministry of Ecology and Environment (MEE), 2018. Revision of the Ambient air quality standards (GB 3095–2012) (in Chinese), 2018.
- Veefkind, J. P., Aben, I., McMullan, K., Förster, H., de Vries, J., Otter, G., Claas, J., Eskes, H. J.,

- de Haan, J. F., Kleipool, Q., van Weele, M., Hasekamp, O., Hoogeveen, R., Landgraf, J., Snel, R., Tol, P., Ingmann, P., Voors, R., Kruizinga, B., Vink, R., Visser, H., and Levelt, P. F.: TROPOMI on the ESA Sentinel-5 Precursor: A GMES mission for global observations of the atmospheric composition for climate, air quality and ozone layer applications, *Remote Sensing of Environment*, 120, 70–83, 2012.
- Wang, D., Liang, S., Zhang, Y., Gao, X., Brown, M. G. L., and Jia, A.: A New Set of MODIS Land Products (MCD18): Downward Shortwave Radiation and Photosynthetically Active Radiation, *Remote Sensing*, 12, 168, 2020.
- Zhang, T., Zhou, Y., Zhu, Z., Li, X., and Asrar, G. R.: A global seamless 1 km resolution daily land surface temperature dataset (2003–2020), *Earth System Science Data*, 14, 651–664, 10.5194/essd-14-651-2022, 2022.
